# Supplementary material
Source: PubMed Central journal article supplement (PMC5642040)
Supplement: NIHMS910142-supplement-supp.pdf [file NIHMS910142-supplement-supp.pdf]

## Supporting Information

### Targeted Annotation of S-Sulfonylated Peptides by Selective Infrared Multiphoton Dissociation Mass Spectrometry

Nicholas B. Borotto, Phillip J. McClory, Brent R. Martin\* and Kristina Håkansson\*

Department of Chemistry, University of Michigan, 930 N. University Ave., Ann Arbor, MI 48109, USA

\*Corresponding authors: [brentm@umich.edu](mailto:brentm@umich.edu); [kicki@umich.edu](mailto:kicki@umich.edu)

## Contents

|                                                                                                     |   |
|-----------------------------------------------------------------------------------------------------|---|
| Supporting Figures.....                                                                             | 2 |
| Figure S1. CID Spectrum of Oxidized Laminin $\beta$ .....                                           | 2 |
| Figure S2. Unoxidized and Oxidized Laminin $\beta$ Before and After IR Irradiation.....             | 2 |
| Figure S3 Unoxidized, Oxidized, and Alkylated Laminin $\beta$ Before and After IR Irradiation ..... | 3 |
| Figure S4. Mass spectra of LC separated standard peptides before and after IR irradiation....       | 4 |
| Figure S5. Sample DJ-1 peptides before and after IR irradiation.....                                | 5 |
| Figure S6. IR irradiation of DJ-1 peptide DVVICPDASLEDAK before and after oxidation.....            | 5 |
| Supporting Tables.....                                                                              | 6 |
| Table S1. Relative ion abundance of peptide standards after IR irradiation. ....                    | 6 |
| Table S2. Relative ion abundance of DJ-1 and AhpC tryptic peptides after IR irradiation. ....       | 7 |

## Supporting Figures

### Figure S1. CID Spectrum of Oxidized Laminin $\beta$ .

CID MS/MS spectrum of doubly protonated, oxidized laminin  $\beta$ . \* denotes product ions that contain the modification. All product ions are consistent with modification at the N-terminal Cysteine (v denotes harmonics).

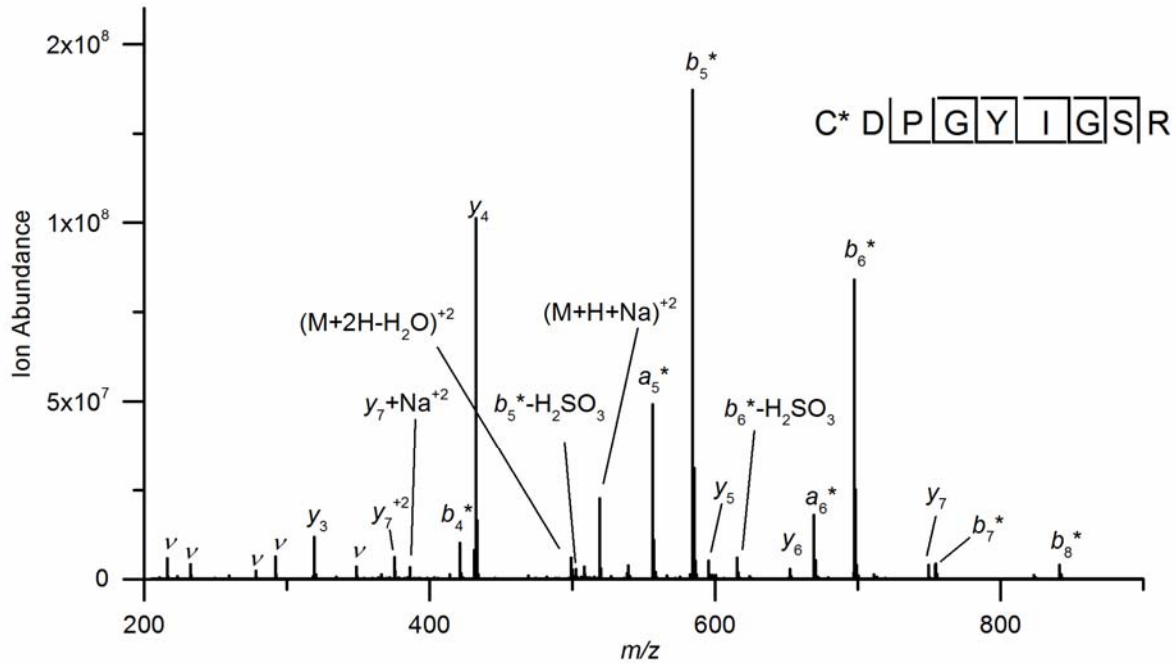

### Figure S2. Unoxidized and Oxidized Laminin $\beta$ Before and After IR Irradiation

Overlaid mass spectra of unoxidized and oxidized laminin  $\beta$  (CDPGYIGSR and C[SO<sub>3</sub>]DPGYIGSR, respectively) isolated together using a wide window, before (black) and after (red) IR irradiation at 10.6  $\mu$ m for 0.2 s at 23 W. Product ions that contain the sulfonic acid are designated with \*.

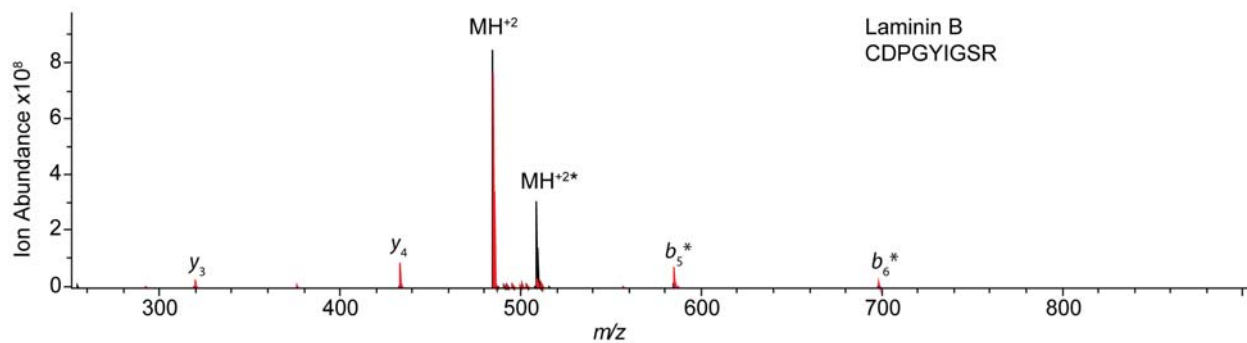

**Figure S3. Unoxidized, Oxidized, and Alkylated Laminin  $\beta$  Before and After IR Irradiation**  
Overlaid mass spectra of unoxidized, oxidized, and alkylated laminin  $\beta$  (CDPGYIGSR, C[SO<sub>3</sub>]DPGYIGSR, and C[SC<sub>2</sub>H<sub>3</sub>NO]DPGYIGSR) isolated together using a wide window, before (black) and after (red) IR irradiation at 10.6  $\mu$ m for 0.2 s at 23 W. Alkylated and oxidized species are indicated using # and \*, respectively.

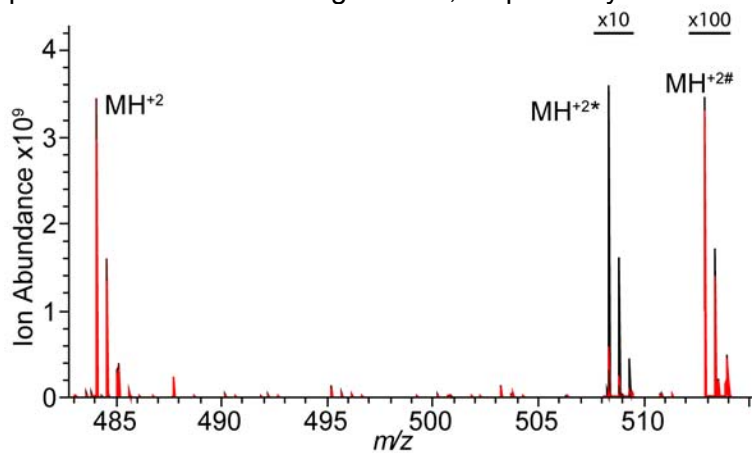

**Figure S4. Mass spectra of LC separated standard peptides before and after IR irradiation.**

Representative mass spectra for oxidized Laminin  $\beta$  (Figure 2, peak 1), oxidized ACTH 1-10 (Figure 2, peak 2), ACTH 1-10 (Figure 2, peak 3), and oxidized Insulin chain B (Figure 2, peak 6) before (black) and after (red) IR irradiation (15 W for 0.15 s). Laminin  $\beta$  inlay included to more clearly illustrate the preferential fragmentation of the doubly charged peptide ( $m/z = 508.2153$ ).

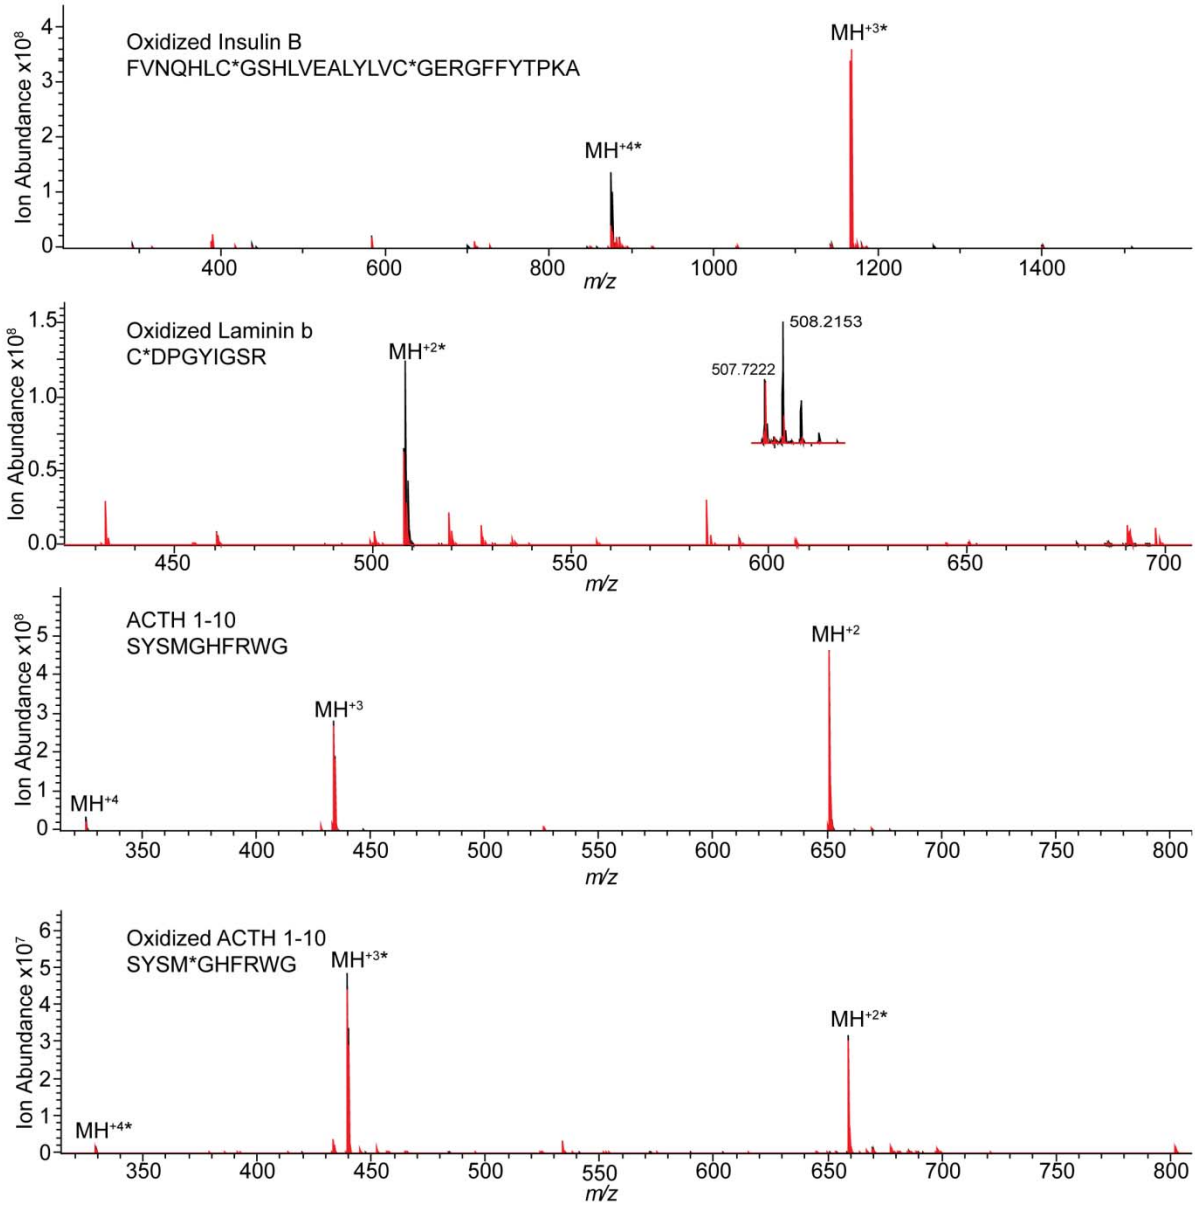

**Figure S5. Sample DJ-1 peptides before and after IR irradiation**

Mass spectra for A) DJ-1 peptide 13-27 (Figure 3, peak 1) and B) DJ-1 peptide 64-89 (Figure 3, peak 3) before (black) and after (red) IR irradiation (15 W for 0.15 s).

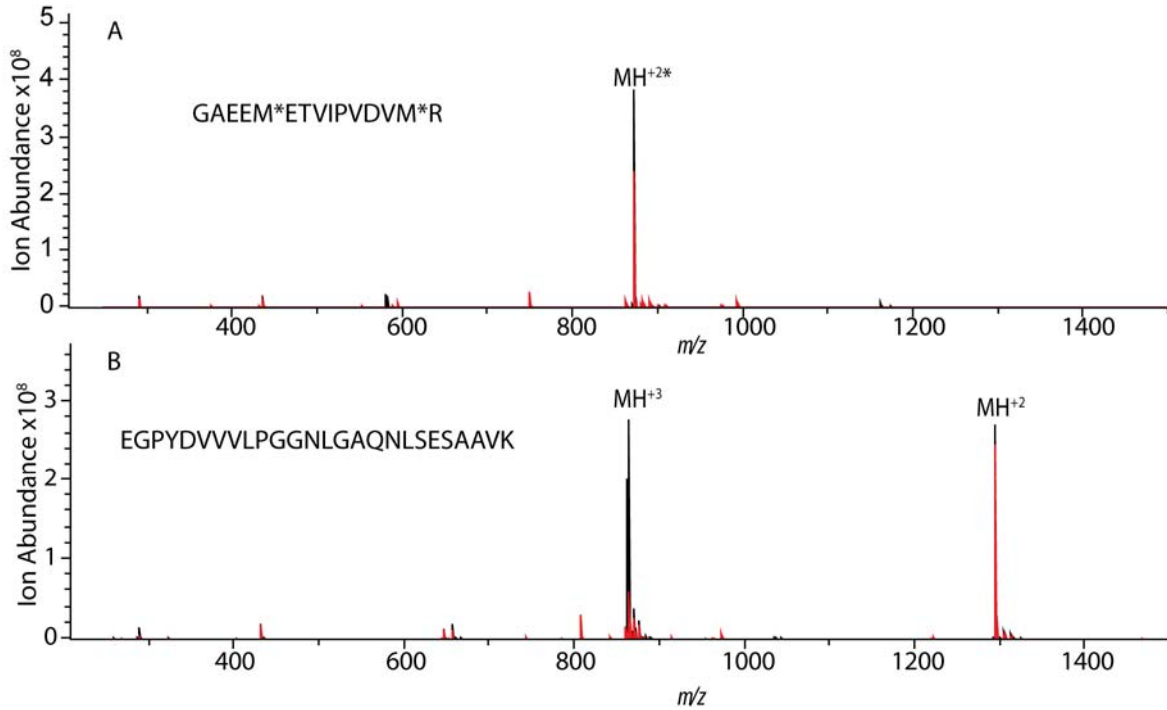

**Figure S6. IR irradiation of DJ-1 peptide DVVICPDASLEDAK before and after oxidation.**

Mass Spectra of oxidized (top) and unoxidized (bottom) DJ-1 peptide 49-62. The spectra obtained following IR irradiation (red) are overlaid on the spectra obtained without irradiation (black).

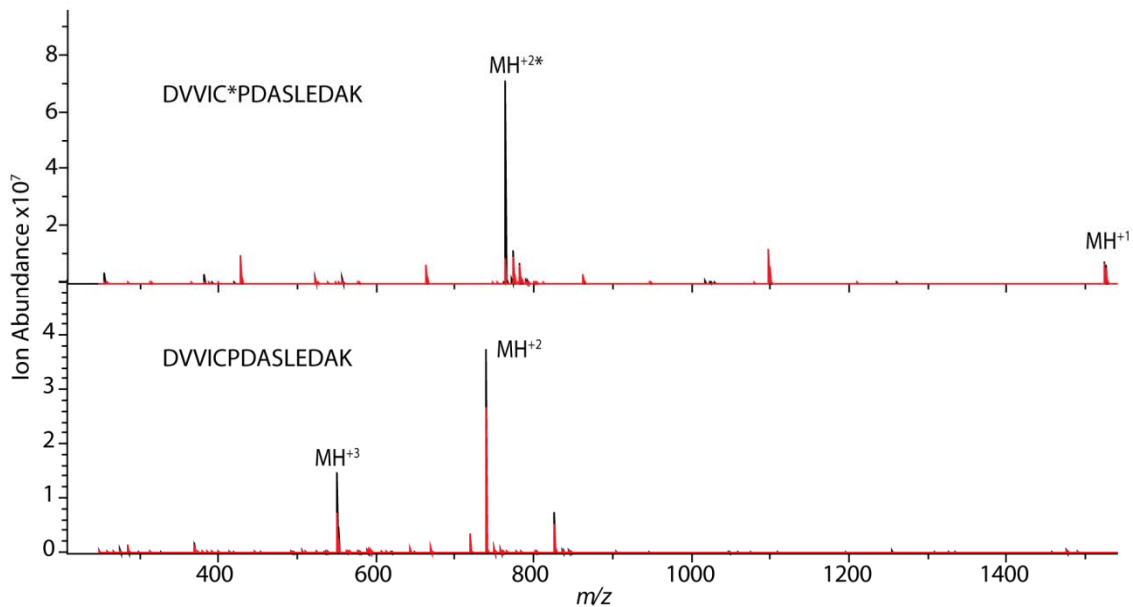

## Supporting Tables

**Table S1. Relative ion abundance of peptide standards after IR irradiation.**

Relative abundance of irradiated peptide standards post IR irradiation.

| Peptide                            | Sequence                       | Modification   | Relative Abundance* |
|------------------------------------|--------------------------------|----------------|---------------------|
| Insulin Chain A Tyrosine           | GIVEQCCASVCSLYQLENYCN          | Sulfonic Acid  | 0.4%                |
| Phosphopeptide                     | TSTEPQYQPGEN                   | Phosphorylated | 4.2%                |
| Neuropeptide F                     | KRSYEEHIP                      | Phosphorylated | 4.5%                |
| Laminin $\beta$ -1 Chain (925-933) | CDPGYIGSR                      | Sulfonic Acid  | 9.9%                |
| Insulin Chain B                    | FVNQHLCGSHLVEALYLVCGERGFFYTPLA | Sulfonic Acid  | 49.0%               |
| Substance P (5-11)                 | pyro-QQFFGLM-NH <sub>3</sub>   | Oxidized       | 83.4%               |
| Substance P (5-11)                 | pyro-QQFFGLM-NH <sub>3</sub>   | n/a            | 84.2%               |
| Laminin $\beta$ -1 Chain (925-933) | CDPGYIGSR                      | n/a            | 90.8%               |
| Angiotensin I                      | DRVYIHPFHL                     | n/a            | 92.8%               |
| Substance P                        | RPKPQQFFGLM-NH <sub>3</sub>    | n/a            | 92.9%               |
| ACTH 1-10                          | SYSMEHFRWG                     | n/a            | 94.1%               |
| Substance P                        | RPKPQQFFGLM-NH <sub>3</sub>    | Oxidized       | 98.0%               |
| Leucine Enkephalin                 | YGGFL                          | n/a            | 99.8%               |
| ACTH 1-10                          | SYSMEHFRWG                     | Oxidized       | 107.2%              |

\*Relative ion abundance was calculated by dividing the average remaining ion abundance after IR irradiation by the average ion abundance prior to irradiation

**Table S2. Relative ion abundance of DJ-1 and AhpC tryptic peptides after IR irradiation.**

Relative abundance of irradiated DJ-1 and AhpC peptides post IR irradiation

| Protein | Start | End | Sequence                            | Modifications                 | Relative Abundance* |
|---------|-------|-----|-------------------------------------|-------------------------------|---------------------|
| DJ-1    | 64    | 89  | (K)EGPYDVVVLPGGNLGAQNLSESAAVK(E)    | n/a                           | 1.2%                |
| DJ-1    | -21   | 4   | (-)AHHHHHHVGTGSNDDDDKSPDMASK(R)     | Oxidized                      | 1.9%                |
| DJ-1    | 100   | 122 | (K)GLIAAICAGPTALLAHEIGFGSK(V)       | Sulfonic Acid                 | 3.4%                |
| DJ-1    | 49    | 63  | (R)DVVICPDASLEDAKK(E)               | Sulfonic Acid                 | 7.2%                |
| DJ-1    | 100   | 115 | (K)GLIAAICAGPTALLAH(E)              | Sulfonic Acid                 | 7.4%                |
| DJ-1    | 49    | 62  | (R)DVVICPDASLEDAK(K)                | Sulfonic Acid                 | 12.5%               |
| DJ-1    | 33    | 48  | (K)VTVAGLAGKDPVQC(SR)(D)            | Sulfonic Acid                 | 17.5%               |
| AhpC    | 21    | 50  | (E)FIEITEKDTEGRWSVFFFYPADFTFVCPT(L) | 3 oxidations<br>Sulfonic Acid | 18.2%               |
| AhpC    | 124   | 143 | (F)VVDPPQGIQAEIVTAEGIGR(D)          | n/a                           | 19.7%               |
| DJ-1    | 64    | 81  | (K)EGPYDVVVLPGGNLGAQN(L)            | n/a                           | 27.7%               |
| DJ-1    | 64    | 89  | (K)EGPYDVVVLPGGNLGAQNLSESAAVK(E)    | Oxidized                      | 28.8%               |
| AhpC    | 21    | 50  | (E)FIEITEKDTEGRWSVFFFYPADFTFVCPT(L) | 2 Oxidations<br>Sulfonic Acid | 31.5%               |
| DJ-1    | 51    | 75  | (V)VICPDASLEDAKKEGPYDVVVLPGG(N)     | Sulfonic Acid                 | 53.4%               |
| AhpC    | 172   | 187 | (K)EGEATLAPSLDLVGKI(-)              | n/a                           | 58.8%               |
| AhpC    | 179   | 186 | (A)PSLDLVGK(I)                      | n/a                           | 63.8%               |
| DJ-1    | 13    | 27  | (K)GAEEMETVIPVDV(MR)(R)             | Oxidized                      | 64.7%               |
| AhpC    | 181   | 186 | (S)LDLVGK(I)-(L)DLVGKI              | n/a                           | 66.0%               |
| DJ-1    | 49    | 63  | (R)DVVICPDASLEDAKK(E)               | n/a                           | 66.8%               |
| AhpC    | 113   | 120 | (R)EDEGLADR(A)                      | n/a                           | 68.7%               |
| AhpC    | 172   | 187 | (K)EGEATLAPSLDLVGKI(-)              | Oxidized                      | 69.1%               |
| DJ-1    | 49    | 62  | (R)DVVICPDASLEDAK(K)                | n/a                           | 69.1%               |
| DJ-1    | 90    | 93  | (K)EILK(E)                          | n/a                           | 70.2%               |
| AhpC    | 107   | 120 | (R)NFDN(M)REDEGLADR(A)              | Oxidized                      | 72.2%               |
| AhpC    | 147   | 150 | (S)DLLR(K)                          | n/a                           | 73.0%               |
| DJ-1    | 63    | 89  | (K)KEGPYDVVVLPGGNLGAQNLSESAAVK(E)   | n/a                           | 73.5%               |
| AhpC    | 92    | 106 | (K)IKYAMIGDPTGALTR(N)               | n/a                           | 74.9%               |
| AhpC    | 146   | 150 | (A)SDLLR(K)                         | n/a                           | 76.4%               |
| DJ-1    | 123   | 130 | (K)VTTHPLAK(D)                      | n/a                           | 78.7%               |
| DJ-1    | 13    | 27  | (K)GAEEMETVIPVDV(MR)(R)             | n/a                           | 79.8%               |
| AhpC    | 18    | 27  | (K)NGEFIEITEK(D)                    | n/a                           | 84.1%               |
| DJ-1    | 78    | 90  | (N)LGAQNLSESAAVK(E)                 | n/a                           | 85.1%               |
| DJ-1    | 183   | 189 | (K)APLVLK(D)                        | n/a                           | 85.1%               |
| DJ-1    | 7     | 12  | (A)LVILAK(G)                        | n/a                           | 91.7%               |
| DJ-1    | 33    | 41  | (K)VTVAGLAGK(D)                     | n/a                           | 92.1%               |
| DJ-1    | 152   | 156 | (L)ILTSR(G)                         | n/a                           | 94.4%               |
| DJ-1    | 149   | 156 | (K)DGLILTSR(G)                      | n/a                           | 96.1%               |
| DJ-1    | 165   | 175 | (F)ALAIVEALNGK(E)                   | n/a                           | 96.5%               |
| DJ-1    | 34    | 41  | (V)TVAGLAGK(D)                      | n/a                           | 96.5%               |
| DJ-1    | 118   | 122 | (I)GFGSK(V)                         | n/a                           | 96.9%               |
| AhpC    | 144   | 150 | (R)DASDLLR(K)                       | n/a                           | 100.2%              |
| DJ-1    | 184   | 188 | (A)PLVLK(D)                         | n/a                           | 100.7%              |
| DJ-1    | 183   | 188 | (K)APLVLK(D)                        | Oxidized                      | 101.0%              |
| DJ-1    | 7     | 11  | (A)LVILA(K)                         | n/a                           | 101.2%              |

| Protein | Start | End | Sequence                | Modifications | Relative Abundance* |
|---------|-------|-----|-------------------------|---------------|---------------------|
| AhpC    | 172   | 182 | (K)EGEATLAPSLD(L)       | n/a           | 101.3%              |
| AhpC    | 170   | 186 | (K)WKEGEATLAPSLDLVGK(I) | n/a           | 103.2%              |
| DJ-1    | 157   | 164 | (R)GPGTSFEF(A)          | n/a           | 103.2%              |
| DJ-1    | 9     | 12  | (V)ILAK(G)              | n/a           | 106.3%              |
| DJ-1    | 35    | 41  | (T)VAGLAGK(D)           | n/a           | 107.1%              |
| DJ-1    | 153   | 156 | (I)LTSR(G)              | n/a           | 107.7%              |
| DJ-1    | 8     | 12  | (L)VILAK(G)             | n/a           | 108.0%              |
| DJ-1    | 36    | 41  | (V)AGLAGK(D)            | n/a           | 110.8%              |
| DJ-1    | 133   | 145 | (K)MMNGGHYTYSENR(V)     | Oxidized      | 110.9%              |
| AhpC    | 107   | 120 | (R)NFDNMREDEGLADR(A)    | n/a           | 110.9%              |
| DJ-1    | 185   | 188 | (P)LVLK(D)              | n/a           | 113.7%              |
| AhpC    | 109   | 120 | (F)DNMREDEGLADR/(A)     | n/a           | 115.9%              |
| DJ-1    | 6     | 12  | (R)ALVILAK(G)           | n/a           | 117.1%              |
| DJ-1    | 183   | 188 | (K)APLVLK(D)            | n/a           | 118.8%              |
| AhpC    | 172   | 186 | (K)EGEATLAPSLDLVGK(I)   | n/a           | 122.5%              |
| AhpC    | 94    | 106 | (K)YAMIGDPTGALTR(N)     | n/a           | 123.7%              |
| AhpC    | 170   | 187 | (K)WKEGEATLAPSLDLVGK(-) | n/a           | 124.1%              |
| DJ-1    | 176   | 182 | (K)EVAAQVK(A)           | n/a           | 131.1%              |
| AhpC    | 64    | 80  | (K)LGVDVYAVSTDTHFTHK(A) | n/a           | 131.9%              |

\*Relative ion abundance was calculated by dividing the average remaining ion abundance after IR irradiation by the average ion abundance prior to irradiation
